# Supplementary material for: The Biosynthesis of the Monoterpene Tricyclene in E. coli through the Appropriate Truncation of Plant Transit Peptides
Source: MDPI journal article supplement (doi:10.3390/fermentation10030173), 2024-03-20
Supplement: s1 [file s1]

## Supplementary materials

**Table S1. Strains and plasmids used in this study.**

| Strains or plasmids   | Descriptions                                                                                            | Source             |
|-----------------------|---------------------------------------------------------------------------------------------------------|--------------------|
| <b>Strains</b>        |                                                                                                         |                    |
| BS1101                | MG1655 with RecE and RecF pathways associated genes removed and with endA encoding endonuclease removed | (Bao et al., 2019) |
| ZMJ01                 | BS1101 harboring pAC-6409mva,3933-agGPPS-tri1411                                                        | This study         |
| ZMJ02                 | BS1101 harboring pAC-6409mva,3933-agGPPS-tri1411-2                                                      | This study         |
| ZMJ03                 | BS1101 harboring pAC-6409mva,3933-agGPPS-tri1411(19)                                                    | This study         |
| ZMJ04                 | BS1101 harboring pAC-6409mva,3933-agGPPS-tri1411(24)                                                    | This study         |
| ZMJ05                 | BS1101 harboring pAC-6409mva,3933-agGPPS-tri1411(37)                                                    | This study         |
| ZMJ06                 | BS1101 harboring pAC-6409mva,3933-agGPPS-tri1411(38)                                                    | This study         |
| ZMJ07                 | BS1101 harboring pAC-6409mva,3933-agGPPS-tri1411(39)                                                    | This study         |
| ZMJ08                 | BS1101 harboring pAC-6409mva,3933-agGPPS-tri1411(40)                                                    | This study         |
| ZMJ09                 | BS1101 harboring pAC-6409mva,3933-agGPPS-tri1411(41)                                                    | This study         |
| ZMJ10                 | BS1101 harboring pAC-6409mva,3933-agGPPS-tri1411(42)                                                    | This study         |
| ZMJ11                 | BS1101 harboring pAC-6409mva,3933-agGPPS-tri1411(43)                                                    | This study         |
| ZMJ12                 | BS1101 harboring pAC-6409mva,3933-agGPPS-tri1411(44)                                                    | This study         |
| ZMJ13                 | BS1101 harboring pAC-6409mva,3933-agGPPS-tri1411(45)                                                    | This study         |
| ZMJ14                 | BS1101 harboring pAC-6409mva,3933-agGPPS-tri1411(46)                                                    | This study         |
| ZMJ15                 | BS1101 harboring pAC-6409mva,3933-agGPPS-tri1411(47)                                                    | This study         |
| ZMJ16                 | BS1101 harboring pAC-6409mva,3933-agGPPS-tri1411(48)                                                    | This study         |
| ZMJ17                 | BS1101 harboring pAC-6409mva,3933-agGPPS-tri1411(49)                                                    | This study         |
| ZMJ18                 | BS1101 harboring pAC-6409mva,3933-agGPPS-3950(44)                                                       | This study         |
| ZMJ19                 | BS1101 harboring pAC-6409mva,3933-agGPPS-4091(44)                                                       | This study         |
| ZMJ20                 | BS1101 harboring pAC-6409mva,3933-agGPPS-4926(44)                                                       | This study         |
| ZMJ21                 | BS1101 harboring pAC-6409mva,3933-agGPPS-5066(44)                                                       | This study         |
| ZMJ22                 | BS1101 harboring pAC-6409mva,3933-agGPPS-6118(44)                                                       | This study         |
| ZMJ23                 | BS1101 harboring pAC-6409mva,3933-agGPPS-8401(44)                                                       | This study         |
| ZMJ24                 | BS1101 harboring pAC-6409mva,3933-agGPPS-8653(44)                                                       | This study         |
| ZMJ25                 | BS1101 harboring pAC-6409mva,3933-agGPPS-9309(44)                                                       | This study         |
| ZMJ26                 | BS1101 harboring pAC-6409mva,3933-agGPPS-9982(44)                                                       | This study         |
| ZMJ27                 | BS1101 harboring pAC-6409mva,3933-agGPPS-5307(44)                                                       | This study         |
| ZMJ28                 | BS1101 harboring pAC-6409mva,3933-agGPPS-1430(44)                                                       | This study         |
| ZMJ29                 | BS1101 harboring pAC-6409mva,3933-agGPPS-1335(44)                                                       | This study         |
| ZMJ30                 | BS1101 harboring pAC-6409mva,3933-agGPPS-1607(44)                                                       | This study         |
| ZMJ31                 | BS1101 harboring pAC-6409mva,3933-agGPPS-3780(44)                                                       | This study         |
| ZMJ32                 | BS1101 harboring pAC-6409mva,3933-agGPPS-7423(44)                                                       | This study         |
| ZMJ33                 | BL21(DE3) harboring pET21-tri1411                                                                       | This study         |
| ZMJ34                 | BL21(DE3) harboring pET21-tri1411(44)                                                                   | This study         |
| <b>Plasmids</b>       |                                                                                                         |                    |
| pAC-6409mva           | P <sub>lacUV5</sub> ::AtoB,HMGS,HMGR;P <sub>trc</sub> ::MK,PMK,PMD,idi;P15a;Cm <sup>r</sup>             | (Bao et al., 2021) |
| 3933-agGPPS-tri1411   | P <sub>trc</sub> ::AgGPPS,1411;ColE1;Amp <sup>r</sup>                                                   | This study         |
| 3933-agGPPS-tri1411-2 | P <sub>trc</sub> ::AgGPPS,1411-2;ColE1;Amp <sup>r</sup>                                                 | This study         |

|                         |                                                           |            |
|-------------------------|-----------------------------------------------------------|------------|
| 3933-agGPPS-tri1411(19) | P <sub>trc</sub> ::AgGPPS,1411(19);ColE1;Amp <sup>r</sup> | This study |
| 3933-agGPPS-tri1411(24) | P <sub>trc</sub> ::AgGPPS,1411(24);ColE1;Amp <sup>r</sup> | This study |
| 3933-agGPPS-tri1411(37) | P <sub>trc</sub> ::AgGPPS,1411(37);ColE1;Amp <sup>r</sup> | This study |
| 3933-agGPPS-tri1411(38) | P <sub>trc</sub> ::AgGPPS,1411(38);ColE1;Amp <sup>r</sup> | This study |
| 3933-agGPPS-tri1411(39) | P <sub>trc</sub> ::AgGPPS,1411(39);ColE1;Amp <sup>r</sup> | This study |
| 3933-agGPPS-tri1411(40) | P <sub>trc</sub> ::AgGPPS,1411(40);ColE1;Amp <sup>r</sup> | This study |
| 3933-agGPPS-tri1411(41) | P <sub>trc</sub> ::AgGPPS,1411(41);ColE1;Amp <sup>r</sup> | This study |
| 3933-agGPPS-tri1411(42) | P <sub>trc</sub> ::AgGPPS,1411(42);ColE1;Amp <sup>r</sup> | This study |
| 3933-agGPPS-tri1411(43) | P <sub>trc</sub> ::AgGPPS,1411(43);ColE1;Amp <sup>r</sup> | This study |
| 3933-agGPPS-tri1411(44) | P <sub>trc</sub> ::AgGPPS,1411(44);ColE1;Amp <sup>r</sup> | This study |
| 3933-agGPPS-tri1411(45) | P <sub>trc</sub> ::AgGPPS,1411(45);ColE1;Amp <sup>r</sup> | This study |
| 3933-agGPPS-tri1411(46) | P <sub>trc</sub> ::AgGPPS,1411(46);ColE1;Amp <sup>r</sup> | This study |
| 3933-agGPPS-tri1411(47) | P <sub>trc</sub> ::AgGPPS,1411(47);ColE1;Amp <sup>r</sup> | This study |
| 3933-agGPPS-tri1411(48) | P <sub>trc</sub> ::AgGPPS,1411(48);ColE1;Amp <sup>r</sup> | This study |
| 3933-agGPPS-tri1411(49) | P <sub>trc</sub> ::AgGPPS,1411(49);ColE1;Amp <sup>r</sup> | This study |
| 3933-agGPPS-3950(44)    | P <sub>trc</sub> ::AgGPPS,3950(44);ColE1;Amp <sup>r</sup> | This study |
| 3933-agGPPS-4091(44)    | P <sub>trc</sub> ::AgGPPS,4091(44);ColE1;Amp <sup>r</sup> | This study |
| 3933-agGPPS-4926(44)    | P <sub>trc</sub> ::AgGPPS,4926(44);ColE1;Amp <sup>r</sup> | This study |
| 3933-agGPPS-5066(44)    | P <sub>trc</sub> ::AgGPPS,5066(44);ColE1;Amp <sup>r</sup> | This study |
| 3933-agGPPS-6118(44)    | P <sub>trc</sub> ::AgGPPS,6118(44);ColE1;Amp <sup>r</sup> | This study |
| 3933-agGPPS-8401(44)    | P <sub>trc</sub> ::AgGPPS,8401(44);ColE1;Amp <sup>r</sup> | This study |
| 3933-agGPPS-8653(44)    | P <sub>trc</sub> ::AgGPPS,8653(44);ColE1;Amp <sup>r</sup> | This study |
| 3933-agGPPS-9309(44)    | P <sub>trc</sub> ::AgGPPS,9309(44);ColE1;Amp <sup>r</sup> | This study |
| 3933-agGPPS-9982(44)    | P <sub>trc</sub> ::AgGPPS,9982(44);ColE1;Amp <sup>r</sup> | This study |
| 3933-agGPPS-5307(44)    | P <sub>trc</sub> ::AgGPPS,5307(44);ColE1;Amp <sup>r</sup> | This study |
| 3933-agGPPS-1430(44)    | P <sub>trc</sub> ::AgGPPS,1430(44);ColE1;Amp <sup>r</sup> | This study |
| 3933-agGPPS-1335(44)    | P <sub>trc</sub> ::AgGPPS,1335(44);ColE1;Amp <sup>r</sup> | This study |
| 3933-agGPPS-1607(44)    | P <sub>trc</sub> ::AgGPPS,1607(44);ColE1;Amp <sup>r</sup> | This study |
| 3933-agGPPS-3780(44)    | P <sub>trc</sub> ::AgGPPS,3708(44);ColE1;Amp <sup>r</sup> | This study |
| 3933-agGPPS-7423(44)    | P <sub>trc</sub> ::AgGPPS,7423(44);ColE1;Amp <sup>r</sup> | This study |
| pET21-tri1411           | P <sub>T7</sub> ::1411,6xHis;ColE1;Amp <sup>r</sup>       | This study |
| pET21-tri1411(44)       | P <sub>T7</sub> ::1411(44),6xHis;ColE1;Amp <sup>r</sup>   | This study |

**Table S2. Primers used in this study.**

| Primer name             | Primer sequence                                      |
|-------------------------|------------------------------------------------------|
| GPPS-1411-1411-gibson-R | GCATGCCTGCAGGTCGACTCTAGAG                            |
| GPPS-1411-1411-gibson-F | CCGATCAAAATCTCTGTTCCGTAATTCATTAAAGAGGAGAAAGGTACCGGAT |
| del19-1411-F            | CATGCTGTTTAC                                         |
| del24-1411-F            | AACACCTGCTTCCCGTCTTTACCC                             |
| del37-1411-F            | TCTTTCACCCCGGGTAAATCT                                |
| del38-1411-F            | TCTAAAGCTGAACCGCCGCT                                 |
| del39-1411-F            | GAGAAAGGTACCGGATCATGAAAGCTGAACCGCCGCTG               |
|                         | GCTGAACCGCCGCTGAACCA                                 |

|                           |                                                           |
|---------------------------|-----------------------------------------------------------|
| del40-1411-F              | GAACCGCCGCTGAACCACTCTA                                    |
| del41-1411-F              | CCGCCGCTGAACCACTCTAC                                      |
| del42-1411-F              | CCGCTGAACCACTCTACCATCTCTACCAA                             |
| del43-1411-F              | CTGAACCACTCTACCATCTCTACCAACCA                             |
| del44-1411-F              | AACCACTCTACCATCTCTACCAACCAG                               |
| del45-1411-F              | CACTCTACCATCTCTACCAACCAGTCTTCTT                           |
| del46-1411-F              | TCTACCATCTCTACCAACCAGTCTTCTTC                             |
| del47-1411-F              | ACCATCTCTACCAACCAGTCTTCTTCTTCTGA                          |
| del48-1411-F              | ATCTCTACCAACCAGTCTTCTTCTTCTGAC                            |
| del49-1411-F              | TCTACCAACCAGTCTTCTTCTTCTGAC                               |
| del73-1411-F              | GACTTCGAATACATCCAGTCTATCCAC                               |
| del-1411-R                | GTGATGGTGATGGTGATGCATGATCCGGTACCTTTCTCCTCTTTAATGA         |
| del44-8401-F              | ATCTCTTCTTCTAACGGTATCATCAACCCG                            |
| del44-7423-F              | CCGCCGCTGTCTCACTCTTCTA                                    |
| del44-3708,1335-F         | CTGTCTACCGCTGCTGCTGGT                                     |
| del-7423,8401,3708,1335-R | GTGATGGTGATGGTGATGCATCGGTACCTTTCTCCTCTTTAATGAATTAATTCTGAC |
| del44-TRS-R               | CATGATCCGGTACCTTTCTCCTCTTTAATG                            |
| del44-3950-F              | GAGAAAGGTACCGGATCATGAACCACTCTACCATCTCTACCAACCA            |
| del44-4091-F              | GAGAAAGGTACCGGATCATGCCGCCGCTGAACCACTCTA                   |
| del44-5066-F              | GAGAAAGGTACCGGATCATGATCTCTTCTTCTAACCGTATCACCAACC          |
| del44-6118-F              | GAGAAAGGTACCGGATCATGAACTACCAGCCGCCGATC                    |
| del44-8653-F              | GAGAAAGGTACCGGATCATGAAAGTTGAATCTCCGCTGCTGAAC              |
| del44-9982,9309-F         | GAGAAAGGTACCGGATCATGAACCACTCTCACAACCTGTCTAC               |
| del44-5307-F              | GAGAAAGGTACCGGATCATGATCTCTTCTTCTAACGGTATCATCAACC          |
| del44-1430-F              | GAGAAAGGTACCGGATCATGATCTCTACCAACCTGATCTCTTCTTCTAACG       |
| del44-4926-F              | GAGAAAGGTACCGGATCATGTTCTCTGACCTGAACCCGATCCG               |
| del44-1607-R              | CATCGGTACCTTTCTCCTCTTTAATGAATT                            |
| del44-1607-F              | AGAGGAGAAAGGTACCGATGGGTGGTATGAAACCGGAACCG                 |
| PET-del44-1411-F          | CATATGTATATCTCCTTCTTAAAGTTAAACAAAATTATTTCTAGAGGG          |
| PET-del44-1411-R          | AACCACTCTACCATCTCTACCAACCA                                |

**Table S3. Tricyclene synthases derived from different species.**

| Genes used in this study. |               |                                |
|---------------------------|---------------|--------------------------------|
| Name                      | Accession NO. | Species                        |
| 9309                      | XP_016539309  | <i>Capsicum annuum</i>         |
| 9982                      | PHT29982      | <i>Capsicum baccatum</i>       |
| 8653                      | PHT98653      | <i>Capsicum chinense</i>       |
| 5307                      | NP_001295307  | <i>Lycopersicon esculentum</i> |
| 4091                      | XP_019234091  | <i>Nicotiana attenuata</i>     |
| 1411                      | XP_009791411  | <i>Nicotiana sylvestris</i>    |
| 1335                      | XP_009791335  | <i>Nicotiana sylvestris</i>    |
| 1607                      | XP_009791607  | <i>Nicotiana sylvestris</i>    |
| 3708                      | XP_009773708  | <i>Nicotiana sylvestris</i>    |
| 7423                      | XP_009757423  | <i>Nicotiana sylvestris</i>    |

|      |              |                                  |
|------|--------------|----------------------------------|
| 4926 | XP_016464926 | <i>Nicotiana tabacum</i>         |
| 3950 | XP_009593950 | <i>Nicotiana tomentosiformis</i> |
| 5066 | TMX05066     | <i>Solanum chilense</i>          |
| 8401 | XP_015068401 | <i>Solanum pennellii</i>         |
| 1430 | XP_006351730 | <i>Solanum tuberosum</i>         |
| 6118 | XP_015166118 | <i>Solanum tuberosum</i>         |

**Table S4. Tricyclene and by-product titers of different TSs**

| Name     | Tricyclene<br>titer (mg/L) | $\alpha$ -Pinene<br>titer<br>(mg/L) | Camphene<br>titer (mg/L) | Sabinene<br>titer<br>(mg/L) | $\beta$ -Pinene<br>titer<br>(mg/L) | Limonene<br>titer<br>(mg/L) | % Tricyclene<br>of Total<br>Monoterpenes |
|----------|----------------------------|-------------------------------------|--------------------------|-----------------------------|------------------------------------|-----------------------------|------------------------------------------|
| 1411     | 0.299                      | 0.000                               | 0.066                    | 0.045                       | 0.221                              | 0.179                       | 36.9%                                    |
| 4091(44) | 0.135                      | 0.000                               | 0.082                    | 0.017                       | 0.210                              | 0.174                       | 21.8%                                    |
| 4926(44) | 0.340                      | 0.052                               | 0.072                    | 0.046                       | 0.261                              | 0.339                       | 30.7%                                    |
| 5066(44) | 0.459                      | 0.089                               | 0.380                    | 0.023                       | 0.331                              | 0.339                       | 28.3%                                    |
| 8653(44) | 4.329                      | 0.290                               | 0.528                    | 0.329                       | 1.306                              | 1.148                       | 54.6%                                    |
| 9309(44) | 0.816                      | 0.062                               | 0.115                    | 0.027                       | 0.315                              | 0.248                       | 51.5%                                    |
| 5307(44) | 1.993                      | 0.332                               | 1.884                    | 0.089                       | 1.193                              | 1.427                       | 28.8%                                    |
| 8401(44) | 4.196                      | 0.503                               | 2.754                    | 0.177                       | 2.093                              | 2.157                       | 35.3%                                    |
| 3708(44) | 0.000                      | 0.556                               | 0.111                    | 0.579                       | 1.339                              | 1.724                       | 0.0%                                     |
| 1411(44) | 48.173                     | 2.227                               | 1.306                    | 4.641                       | 12.655                             | 10.265                      | 60.8%                                    |

**Fig.S1 SDS-PAGE analysis of wild-type 1411 and 1411 (44).**

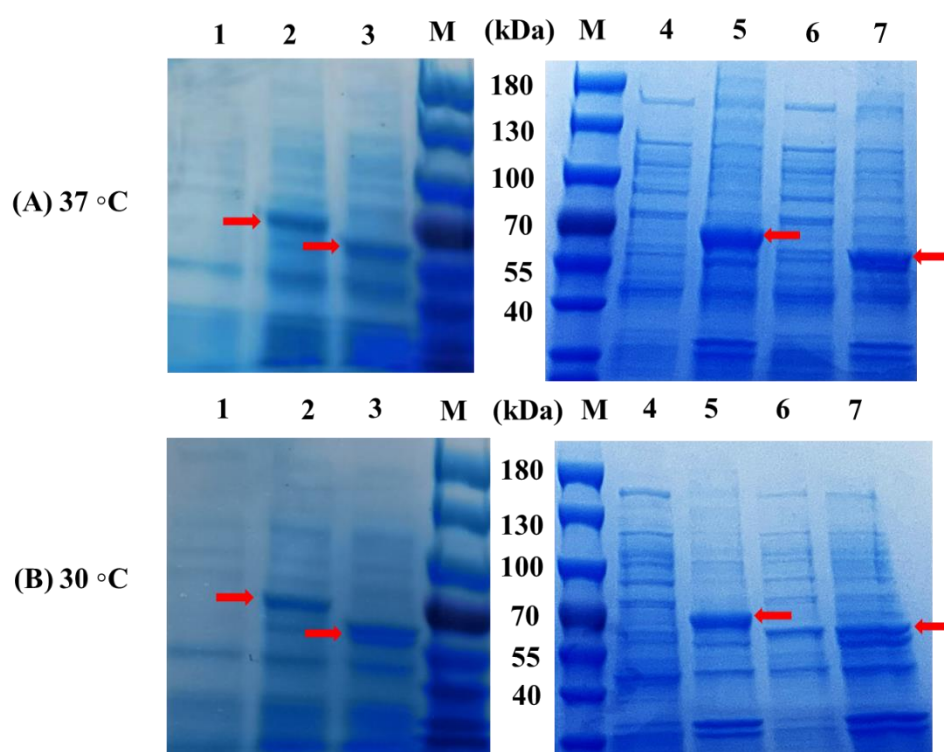

**Figure S1. SDS-PAGE analysis of wild-type 1411 and 1411 (44).** The induction temperatures were 37 °C (A) and 30 °C (B), respectively. Lane M represented the standard protein molecular weight. Lane 1 was the uninduced culture sample of wild-type 1411. Lane 2 and 3 were the induced culture samples of 1411 and 1411(44), respectively. Lane 4 and 5 were the supernatant and resuspended pellet of cell lysate of 1411, respectively. Lane 6 and 7 were the supernatant and resuspended pellet of cell lysate of 1411(44), respectively. The bands corresponding to wild-type 1411 (71.5 kDa) and 1411(44) (66.9 kDa) were indicated by red arrows.
